# Supplementary material for: Association between change in cardiorespiratory fitness and prostate cancer incidence and mortality in 57 652 Swedish men
Source: HighWire-hosted journal article supplement (doi:10.1136/bjsports-2023-107007), 2024-01-30
Supplement: bjsports-2023-107007supp001_data_supplement.pdf [file bjsports-2023-107007supp001_data_supplement.pdf]

## Supplementary file - The association between change in cardiorespiratory fitness and prostate cancer incidence and mortality in 57,652 Swedish men

**Table s1-** Hazards Ratios with 95% confidence intervals for the association between cardiorespiratory fitness at baseline and follow-up and prostate cancer incidence

|                                                                        | Model 1   |             | Model 2   |             | Model 3   |             | Model 4   |             |
|------------------------------------------------------------------------|-----------|-------------|-----------|-------------|-----------|-------------|-----------|-------------|
|                                                                        | Estimates | CI          | Estimates | CI          | Estimates | CI          | Estimates | CI          |
| Baseline VO <sub>2max</sub> (L/min)                                    | 0.51 ***  | 0.45 – 0.57 | 1.04      | 0.91 – 1.20 | 1.06      | 0.92 – 1.21 | 1.05      | 0.91 – 1.20 |
| Follow-up VO <sub>2max</sub> (L/min)                                   | 0.45 ***  | 0.40 – 0.51 | 0.93      | 0.81 – 1.07 | 0.93      | 0.81 – 1.07 | 0.92      | 0.80 – 1.06 |
| Baseline VO <sub>2max</sub> (mL·kg <sup>-1</sup> ·min <sup>-1</sup> )  | 0.95 ***  | 0.94 – 0.96 | 1.01      | 0.99 – 1.02 | 1.00      | 0.99 – 1.01 | 1.00      | 0.99 – 1.01 |
| Follow-up VO <sub>2max</sub> (mL·kg <sup>-1</sup> ·min <sup>-1</sup> ) | 0.95 ***  | 0.94 – 0.95 | 1.00      | 0.98 – 1.01 | 0.99      | 0.98 – 1.00 | 0.99      | 0.98 – 1.00 |
| Observations                                                           | 57652     |             | 57652     |             | 57652     |             | 57652     |             |

\*  $p < 0.05$  \*\*  $p < 0.01$  \*\*\*  $p < 0.001$

Model 1: Adjusted for baseline fitness. Model 2: Adjusted for baseline fitness, age, education, and year of last test. Model 3: Adjusted for baseline fitness, age, education, year of last test, and body mass index. Model 4: Adjusted for baseline fitness, age, education, year of last test, body mass index, and smoking.

**Supplementary Table s2.** Hazards Ratios with 95% confidence intervals for the association between change in cardiorespiratory fitness and prostate cancer incidence

|                                                                          | Model 5 |             | N     | Cases |
|--------------------------------------------------------------------------|---------|-------------|-------|-------|
|                                                                          | HR      | 95% CI      |       |       |
| % change in VO <sub>2max</sub> (L/min)                                   | 0.98 *  | 0.97 – 0.99 | 57652 | 592   |
| Change in VO <sub>2max</sub> (L/min)                                     | 0.53 *  | 0.33 – 0.86 | 57652 | 592   |
| % change in VO <sub>2max</sub> (mL·kg <sup>-1</sup> ·min <sup>-1</sup> ) | 0.99    | 0.98 – 1.01 | 57652 | 592   |
| Change in VO <sub>2max</sub> (mL·kg <sup>-1</sup> ·min <sup>-1</sup> )   | 0.99    | 0.95 – 1.03 | 57652 | 592   |

\*  $p < 0.05$  \*\*  $p < 0.01$  \*\*\*  $p < 0.001$

Model 5: Additionally adjusted for physical activity.

**Supplementary table s3.** Hazards ratios with 95% confidence intervals for incidence in a sensitivity analysis excluding individuals diagnosed with prostate cancer within 2 years of last test

| <i>Predictors</i>                                                        | <b>Model 1</b> |               | <b>Model 2</b> |               | <b>Model 3</b> |               | <b>Model 4</b> |               |
|--------------------------------------------------------------------------|----------------|---------------|----------------|---------------|----------------|---------------|----------------|---------------|
|                                                                          | <i>HR</i>      | <i>95% CI</i> |
| Change in VO <sub>2max</sub> (L/min)                                     | 0.30 ***       | 0.18 – 0.51   | 0.46 *         | 0.26 – 0.84   | 0.46 *         | 0.25 – 0.84   | 0.44 **        | 0.24 – 0.81   |
| % change in VO <sub>2max</sub> (L/min)                                   | 0.97 ***       | 0.95 – 0.98   | 0.98 **        | 0.96 – 0.99   | 0.98 **        | 0.96 – 0.99   | 0.97 **        | 0.96 – 0.99   |
| % change in VO <sub>2max</sub> (mL·kg <sup>-1</sup> ·min <sup>-1</sup> ) | 0.97 ***       | 0.96 – 0.99   | 0.99           | 0.97 – 1.01   | 0.99           | 0.97 – 1.00   | 0.99           | 0.97 – 1.00   |
| Decrease (-3%)                                                           | 1.23           | 1.00 – 1.52   | 1.12           | 0.91 – 1.38   | 1.13           | 0.92 – 1.40   | 1.13           | 0.91 – 1.39   |
| Stable (±3%)                                                             | Ref            |               | Ref            |               | Ref            |               | Ref            |               |
| Increase (+3%)                                                           | 0.77 *         | 0.61 – 0.97   | 0.79           | 0.62 – 1.02   | 0.78           | 0.61 – 1.00   | 0.76 *         | 0.59 – 0.98   |
| Observations                                                             | 57549          |               |                |               |                |               |                |               |
| Diagnosed with prostate cancer within 2 years                            | 103            |               |                |               |                |               |                |               |
| Prostate cancer cases                                                    | 489            |               |                |               |                |               |                |               |

\*  $p < 0.05$  \*\*  $p < 0.01$  \*\*\*  $p < 0.001$ 

Model 1: Adjusted for baseline fitness. Model 2: Adjusted for baseline fitness, age, education, and year of last test. Model 3: Adjusted for baseline fitness, age, education, year of last test, and body mass index. Model 4: Adjusted for baseline fitness, age, education, year of last test, body mass index, and smoking.

**Table s4** - Hazards Ratios with 95% confidence intervals for the association between percentage change in cardiorespiratory fitness at baseline and follow-up and prostate cancer incidence

|                                                                 | Model 1   |               | Model 2   |               | Model 3   |               | Model 4   |               |
|-----------------------------------------------------------------|-----------|---------------|-----------|---------------|-----------|---------------|-----------|---------------|
|                                                                 | <i>HR</i> | <i>95% CI</i> |
| Low (< 32.4 mL·kg <sup>-1</sup> ·min <sup>-1</sup> )            | 0.98      | 0.96 – 1.00   | 0.99      | 0.97 – 1.01   | 0.99      | 0.97 – 1.01   | 0.99      | 0.96 – 1.01   |
| Moderate (32.4 to 40.7 mL·kg <sup>-1</sup> ·min <sup>-1</sup> ) | 0.95 ***  | 0.93 – 0.97   | 0.97 **   | 0.94 – 0.99   | 0.97 **   | 0.94 – 0.99   | 0.97 **   | 0.95 – 1.00   |
| High (>40.7 mL·kg <sup>-1</sup> ·min <sup>-1</sup> )            | 0.94 ***  | 0.91 – 0.98   | 0.97      | 0.94 – 0.99   | 0.97      | 0.94 – 0.99   | 0.97      | 0.94 – 0.99   |

\* *p*<0.05 \*\* *p*<0.01 \*\*\* *p*<0.001

Model 1: Adjusted for baseline fitness. Model 2: Adjusted for baseline fitness, age, education, and year of last test. Model 3: Adjusted for baseline fitness, age, education, year of last test, and body mass index. Model 4: Adjusted for baseline fitness, age, education, year of last test, body mass index, and smoking.



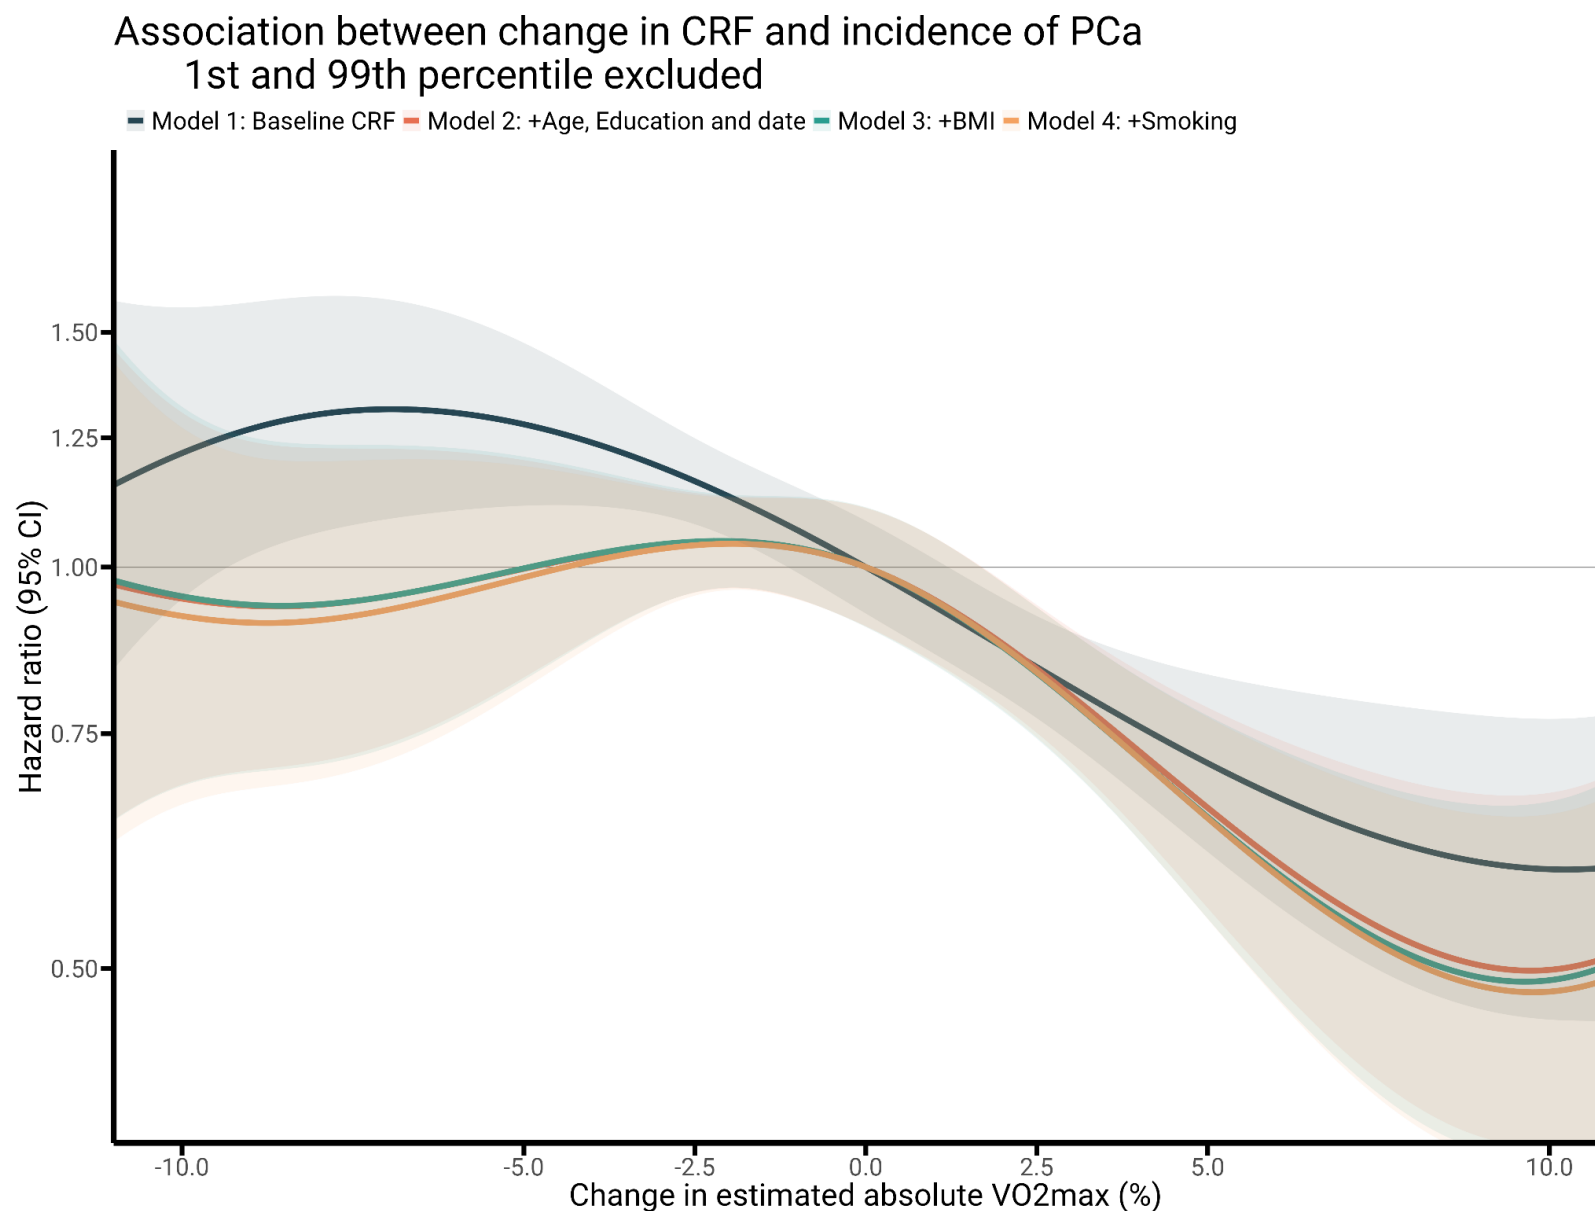

Figure S1 – Sensitivity Analysis: Restricted cubic splines of the cox proportional model examining the association between % change in Cardiorespiratory fitness and incidence of prostate cancer excluding the 1st and 99th percentile. Knots are placed at 5<sup>th</sup>, 50<sup>th</sup> and 95<sup>th</sup> percentile.

**Supplementary table s5. Change in physical activity and change in cardiorespiratory fitness associations using linear regressions**

| <i>Predictors</i>           | <b>Model 1</b> |               | <b>Model 2</b> |               | <b>Model 3</b> |               | <b>Model 4</b> |               |
|-----------------------------|----------------|---------------|----------------|---------------|----------------|---------------|----------------|---------------|
|                             | <i>Beta</i>    | <i>95% CI</i> |
| Change in physical activity | 0.60 ***       | 0.57 – 0.64   | 0.60 ***       | 0.55 – 0.63   | 0.60 ***       | 0.56 – 0.64   | 0.28 ***       | 0.24 – 0.32   |
| Observations                | 57652          |               |                |               |                |               |                |               |

\*  $p < 0.05$  \*\*  $p < 0.01$  \*\*\*  $p < 0.001$

Model 1: Adjusted for baseline fitness. Model 2: Adjusted for baseline fitness, age, education, and year of last test. Model 3: Adjusted for baseline fitness, age, education, year of last test, and body mass index. Model 4: Adjusted for baseline fitness, age, education, year of last test, body mass index, and smoking.
